# Supplementary material
Source: PubMed Central journal article supplement (PMC8891038)

## COVID-19 Incidence Data

County-level COVID-19 incidence data was obtained from a database developed by the *New York Times* that was based on data from public health agencies using methods defined by the Centers for Disease Control and Prevention for reporting aggregated cumulative counts of COVID-19 cases at the county level over time.<sup>1-3</sup> Data were incorporated into a choropleth map also depicting the location of participating hospitals.

## Multiple Imputation

For some patients, data were missing or unavailable for a subset of the prespecified candidate risk factors for mortality and/or respiratory failure. Before applying L1 (lasso) penalized regression,<sup>4-6</sup> we therefore employed multiple imputation using chained equations to avoid bias in the resulting analysis.<sup>7-9</sup> Multiple imputation ensures validity of inference if data is missing at random (missingness pattern and data values are independent conditional on observed data), the most general data-centric missing data assumption.<sup>10</sup>

## Selection of Risk Factors for Inclusion in Multivariable Models

A team of experienced physicians, clinical researchers, and epidemiologists prespecified candidate risk factors for each outcome on the basis of reported association, plausibility, data availability (missingness <20%), and clinical utility. We maintained a ratio of >10:1 outcome events to candidate risk factors to reduce instability in variable selection and estimation.<sup>11,12</sup> Mortality and late-onset respiratory failure candidate risk factors were restricted to data available before or within 24 hours of hospital arrival (eg, highest heart rate in the first 24 hours). Candidate risk factors for early-onset respiratory failure included only data available before or at hospital arrival (eg, first-measured heart rate).

To select lasso tuning parameters  $\lambda$ , multiply imputed datasets were stacked and cross-validation was performed patient-wise.<sup>13-15</sup> Analyses were based on 10 multiply imputed datasets and 10-fold cross-validation across 100 values of the tuning parameter. Each cross-validated model included a random effect for admission hospital.<sup>16</sup> For each value of the tuning parameter, the average cross-validated area under the receiver operating characteristic curve (AUC) was calculated as the mean AUC across all iterations. The relationship between the tuning parameter and the associated models' average cross-validated AUC was smoothed via locally weighted regression (lowess) curves (Supplemental Figure 1),<sup>17</sup> the highest average cross-validated AUC tuning parameter was identified, and the most parsimonious model with an average AUC within 1 standard deviation of the maximal average AUC was selected.<sup>18</sup>

## Patient Inclusion in Risk Factor Analyses

For analysis of risk factors for mortality, we excluded patients (n=10) suspected to have been moribund at presentation based on survival <24 hours from hospital arrival. To avoid misclassification of the outcome, evaluation of early respiratory failure risk factors excluded patients (n=43) who were transferred to the study hospital from an inpatient unit of another hospital. Patients transferred from the emergency department of another hospital were included. Finally, analysis of late respiratory failure risk factors was restricted to patients (n=1196) who did not die or develop respiratory failure within 24 hours of arrival at the study hospital.

## References

1. The *New York Times* Github. Coronavirus (COVID-19) data in the United States. Accessed February 2, 2021. <https://github.com/nytimes/covid-19-data>
2. Turner K, Davidson SL, Collins J, et al. Council of State and Territorial Epidemiologists. Standardized surveillance case definition and national notification for 2019 novel coronavirus disease (COVID-19). 2020. Accessed February 18, 2021. [http://www.cste.org/resource/resmgr/ps/positionstatement2020/Interim-20-ID-02\\_COVID-19.pdf](http://www.cste.org/resource/resmgr/ps/positionstatement2020/Interim-20-ID-02_COVID-19.pdf)
3. Centers for Disease Control and Prevention. Cases, Data, and Surveillance: About CDC COVID-19 Data. 2020. Accessed December 17, 2020. <https://www.cdc.gov/coronavirus/2019-ncov/cases-updates/about-us-cases-deaths.html>
4. Efron B, Hastie T, Johnstone I, et al. Least angle regression. *Ann Stat*. 2004;32(2):407-499.
5. Zou H, Hastie T. Regularization and variable selection via the elastic net. *J R Stat Soc B*. 2005;67(2):301-320.
6. Buuren SV, Groothuis-Oudshoorn K. MICE: Multivariate imputation by chained equations in R. *J Stat Soft*. 2011;45(3).
7. Rubin DB. Inference and missing data. *Biometrika*. 1976;63(3):581-592.
8. White IR, Royston P, Wood AM. Multiple imputation using chained equations: issues and guidance for practice. *Stat Med*. 2010;30(4):377-399.
9. van der Heijden GJMG, T Donders AR, Stijnen T, et al. Imputation of missing values is superior to complete case analysis and the missing-indicator method in multivariable diagnostic research: a clinical example. *J Clin Epidemiol*. 2006;59(10):1102-1109.
10. Rubin DB. Multiple imputation after 18+ years. *J Am Stat Assoc*. 1996;91(434):473.
11. Peduzzi P, Concato J, Kemper E, et al. A simulation study of the number of events per variable in logistic regression analysis. *J Clin Epidemiol*. 1996;49(12):1373-1379.
12. Wynants L, Bouwmeester W, Moons KGM, et al. A simulation study of sample size demonstrated the importance of the number of events per variable to develop prediction models in clustered data. *J Clin Epidemiol*. 2015;68(12):1406-1414.
13. Wood AM, White IR, Royston P. How should variable selection be performed with multiply imputed data? *Stat Med*. 2008;27(17):3227-3246.
14. Du J, Boss J, Han P, et al. Variable selection with multiply-imputed datasets: choosing between stacked and grouped methods. *arXiv*. 2020.
15. Kohavi R. A study of cross-validation and bootstrap for accuracy estimation and model selection. *Proceedings of the International Joint Conference on Artificial Intelligence. IJCAI (U S)*. 1995;14(2):1137-1143. <https://www.ijcai.org/Proceedings/95-2/Papers/016.pdf>
16. Schellendorfer J, Meier L, Bühlmann P. GLMMLasso: an algorithm for high-dimensional generalized linear mixed models using L1-penalization. *J Comput Graph Stat*. 2014;23(2):460-477.
17. Cleveland WS, Devlin SJ. Locally weighted regression: an approach to regression analysis by local fitting. *J Am Stat Assoc*. 1988;83(403):596-610.
18. Hastie T, Tibshirani R, Friedman JH. *The Elements of Statistical Learning: Data Mining, Inference, and Prediction*. 2nd ed. Springer; 2017.

## Supplement 1 Supplementary methods.

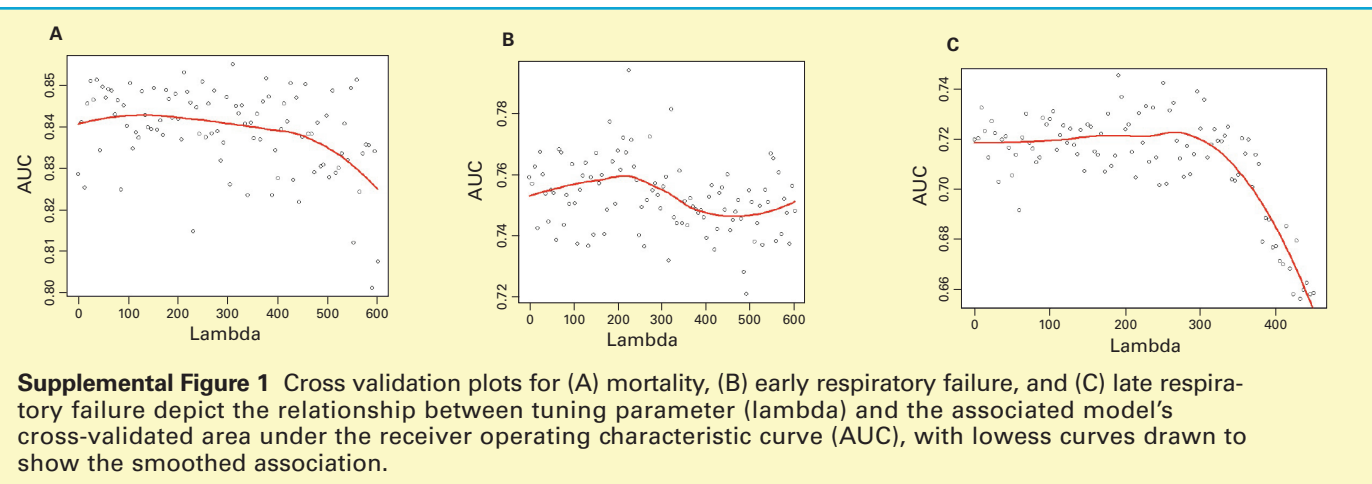

**ALIGN Clinical Center:** Baystate Medical Center—Lori Kozikowski, Sherell Thornton-Thompson, Leslie de Souza, Sarah Romain, Cynthia Kardos; Brigham and Women's Hospital—Rebecca M Baron, Mayra Pinilla Vera, Antonio Arciniegas

**BOSTON Clinical Center:** Beth Israel Deaconess Medical Center—Valerie Banner-Goodspeed, Marie McGourty, Lauren Kelly, Krystal Capers, Melisa Joseph; Massachusetts General Hospital—Kathryn Hibbert, Kelsey Brait, Natalie Pulido, Layla Rahimi, Anna Nicole Dartley; University of Mississippi Medical Center—Alan E. Jones, Rebekah Peacock, Utsav Nandi, James Galbraith, Kelsey Kunk Morgan; Hennepin County Medical Center—Paige DeVries, Brian Driver, Audrey Hendrickson, Michael Puskarich, Jamie Stang

**CALIFORNIA Clinical Center:** UCSF San Francisco—Kimberly Yee, Brian Daniel; UCLA—Nida Qadir, Steven Chang, Gregory Hendey, George Lim, Andrea Tam, Rebecca Beutler, Trisha Agarwal, Julia Vargas; Stanford University Hospital—Jonasel Roque, Rosemary Vojnik; UC Davis—Skyler J. Pearson; UCSF Fresno—Alyssa Hughes; University of Texas—Elizabeth Vidales

**COLORADO Clinical Center:** University of Colorado Hospital—Marc Moss\*, Adit Ginde\*, Carrie Higgins, Jeffrey McKeehan, Lani Finck, Michelle Howell, Jennifer Friedel; Denver Health Medical Center—Jason S. Haukoos, Ivor Douglas, Carolyn Lyle, Stephanie Gravit, Terra Hiller, Judy Oakes, Alicia Cupelo; National Jewish Health I Saint Joseph's Hospital—James Finigan, Christine Griesmer

**MICHIGAN Clinical Center:** University of Michigan Medical Center—Robert C. Hyzy, Pauline K. Park, Kristine Nelson, Norman Olbrich, Kelli McDonough, Stephen Kay, Andrew Admon, Theodore J. Iwashyna; Henry Ford—Namita Jayaprakash, Emanuel P. Rivers, Jasreen Kaur Gill, Anja Kathrina Jaehne, Aaron Cook, Jennifer Swiderek, Jacqueline Day; Wayne State University—Robert Sherwin, James Wooden, Thomas Mazzocco, Jeffrey Harrison, Theodore Falcon

**MONTEFIORE-SINAI Clinical Center:** Montefiore Moses—Michelle Ng Gong\*, Rahul Nair, Omowunmi Amosu, Hiwet Tzehaie, Ayesha Asghar, Aluko A. Hope, Jen-Ting (Tina) Chen; Montefiore Weiler—Brenda Lopez, Caroline Boyle, Tori Aspir, Alexandra Gordon, Bryan Musmacker; University of Arizona—Jarrod Mosier, Cameron Hypes, Elizabeth Salvaggio, Boris Gilson, Jonathan Blohm; Mt. Sinai Hospital—Lynne Richardson, Kusum Mathews, Maxime Centeno, Sam Acquah, Patrick Maher, Neha Goel, George Loo

**OHIO Clinical Center:** Cleveland Clinic Foundation—Abhijit Duggal, Omar Mehkri, Alexander King, Stuart Houltham; University of Cincinnati Medical Center—Kristin M. Hudock, Robert Duncan Hite\*, Nicole Hummel, Jessica Anderson, Tammy Roads

**PACIFIC NORTHWEST Clinical Center:** Harborview Medical Center—Nicholas J Johnson, Bryce RH Robinson\*, Anna Ungar, Sarah Katsandres, Stephanie Gundel; University of Washington—T. Eoin West, Natalie L Cobb, Lara Lovelace-Macon, Denisse Bazan Dow, Navya Garimelle, Ellen Caldwell, Engi Attia; Oregon Health and Science University—Catherine L Hough\*, Akram Khan, Olivia Krol, Stephanie Nonas, Nicole Fontanese, Kelly Vranas; Swedish Hospital—Shane O'Mahony, Julie Wallick; Cedars Sinai Medical Center—Tanzira Zaman, Giuliana Cerro Chiang, June Choe, Lisa Herrera, Niree Hindoyan

**PITTSBURGH Clinical Center:** UPMC—Derek C. Angus, Donald M. Yealy, Elizabeth Gimbel, Denise Scholl, Sara DiFiore, Hunter Skroczyk, Amy Magoun, Alexandra Weissman, David T. Huang; Temple University—George Souiarov, Hannah Reimer, Lillian Finlaw, Sarah Loughran

**SOUTHEAST Clinical Center:** Wake Forest Baptist Health—D. Clark Files, Chadwick Miller, Lauren Koehler; Virginia Commonwealth University Medical Center—Marjolein de Wit, Jessica Mason; Medical University of South Carolina—Andrew J. Goodwin, Abbey Grady, Katie Kirchoff; University of Virginia—Jeff Sturek, Mary Marshall

**UTAH:** Intermountain Medical Center—Samuel Brown\*, Ithan Peltan, Julia Bryan, Jason Jacobs, Brent Armbruster, Joseph Bledsoe\*, Rebecca Roper, Michael Lanspa; University of Utah Hospital—Estelle S. Harris, Lisa J. Weaver, Macy A.G. Barrios, Lindsey J. Waddoups, Ann M. Lyons, Robert Paine III, Benjamin A. Haaland

**VANDERBILT Clinical Center:** Duke University Medical Center—John Eppensteiner, Grace Hall, Andrew Bouffler, Lauren McGowan, Sam Francis, Bria Hall; Louisiana State University Health Sciences Center—Bennet deBoisblanc, Paula Lauto, Connie Romaine, Marie Sandi; Vanderbilt University Medical Center—Todd W. Rice\*, Wesley H. Self\*, Margaret Hays, Megan Roth, Jakea Johnson

**Clinical Coordinating Center:** Massachusetts General Hospital Biostatistics Center (CCC)—David A. Schoenfeld\*, B. Taylor Thompson\*, Douglas L. Hayden, Nancy Ringwood, Cathryn Oldmixon, Christine Ulysse, Richard Morse, Ariela Muzikansky, Laura Fitzgerald, Samuel Whitaker, Alexander Nagrebetsky

**Johns Hopkins Medicine:** Roy G. Brower, Sarina Sahetya

**National Heart, Lung, and Blood Institute:** Lora Reineck, Neil Aggarwal, Karen Bienstock, Michelle Freemer, Myron Maclawiw, Gail Weinmann

**Protocol Review Committee:** Laurie J. Morrison, Mark N. Gillespie, Richard J. Kryscio, Wojciech Zareba, Anne Rompalo, Michael Boeckh

**Data and Safety Monitoring Board:** Polly Parsons, Jason D. Christie, Jesse R. Hall, Nicholas J. Horton, Laurie S. Zoloth, Neal Dickert Jr, Deborah Diercks

\*Clinical Center or CCC Principal Investigator.

**Supplement 2** PETAL Network investigators and collaborating personnel.

**Supplemental Table 1**  
**COVID-19 Ordinal Outcomes Scale**

| Description                                                                          | Score |
|--------------------------------------------------------------------------------------|-------|
| Home without oxygen                                                                  | 1     |
| Long-term care facility or home with oxygen <sup>a</sup>                             | 2     |
| Hospitalized, not receiving oxygen                                                   | 3     |
| Hospitalized, with nasal cannula or face mask oxygen                                 | 4     |
| Hospitalized, receiving noninvasive ventilation or high-flow oxygen                  | 5     |
| Hospitalized, receiving mechanical ventilation                                       | 6     |
| Hospitalized, receiving mechanical ventilation plus other organ support <sup>b</sup> | 7     |
| Death or discharge receiving hospice care                                            | 8     |

<sup>a</sup> Includes patients discharged to long-term acute care hospitals, skilled nursing facilities, and rehabilitation facilities on any degree of respiratory support.  
<sup>b</sup> Other eligible organ support includes vasopressor, renal replacement therapy, and extracorporeal membrane oxygenation.

**Supplemental Table 2**  
**Additional baseline patient characteristics<sup>a</sup>**

| Characteristic                             | No. (%) of patients |                             |                |
|--------------------------------------------|---------------------|-----------------------------|----------------|
|                                            | Overall (N = 1480)  | Hospital outcome            |                |
|                                            |                     | Discharged alive (n = 1218) | Died (n = 262) |
| <b>Comorbidities</b>                       |                     |                             |                |
| Myocardial infarction                      | 74 (5.0)            | 57 (4.7)                    | 17 (6.5)       |
| Congestive heart failure                   | 151 (10.2)          | 95 (7.8)                    | 56 (21.4)      |
| Hypertension                               | 845 (57.1)          | 653 (53.6)                  | 192 (73.3)     |
| Peripheral vascular disease                | 63 (4.3)            | 43 (3.5)                    | 20 (7.6)       |
| Cerebrovascular disease                    | 118 (8.0)           | 82 (6.7)                    | 36 (13.7)      |
| Dementia                                   | 86 (5.8)            | 57 (4.7)                    | 29 (11.1)      |
| Chronic pulmonary disease                  | 351 (23.7)          | 279 (22.9)                  | 72 (27.5)      |
| Long-term home oxygen                      | 70 (4.7)            | 49 (4.0)                    | 21 (8.0)       |
| Chronic obstructive pulmonary disease      | 123 (8.3)           | 91 (7.5)                    | 32 (12.2)      |
| Asthma                                     | 225 (15.2)          | 188 (15.4)                  | 37 (14.1)      |
| Interstitial lung disease                  | 24 (1.6)            | 16 (1.3)                    | 8 (3.1)        |
| Chronic liver disease                      | 53 (3.6)            | 37 (3.0)                    | 16 (6.1)       |
| Diabetes                                   | 473 (32.0)          | 337 (27.7)                  | 136 (51.9)     |
| Obesity (body mass index <sup>b</sup> ≥30) | 712/1382 (51.5)     | 599/1140 (52.5)             | 113/242 (46.7) |
| Connective tissue disease                  | 49 (3.3)            | 39 (3.2)                    | 10 (3.8)       |
| Chronic renal failure                      | 154 (10.4)          | 111 (9.1)                   | 43 (16.4)      |
| Long-term dialysis                         | 43 (2.9)            | 30 (2.5)                    | 13 (5.0)       |
| Immunocompromised                          | 137 (9.3)           | 106 (8.7)                   | 31 (11.8)      |
| Cancer                                     | 133 (9.0)           | 91 (7.5)                    | 42 (16.0)      |
| Solid tumor (no metastasis)                | 69 (4.7)            | 49 (4.0)                    | 20 (7.6)       |
| Solid tumor (with metastasis)              | 37 (2.5)            | 25 (2.1)                    | 12 (4.6)       |
| Lymphoma                                   | 16 (1.1)            | 10 (0.8)                    | 6 (2.3)        |
| Leukemia                                   | 20 (1.4)            | 15 (1.2)                    | 5 (1.9)        |
| HIV or AIDS                                | 18 (1.2)            | 15 (1.2)                    | 3 (1.1)        |
| Alcohol abuse                              | 30 (2.0)            | 26 (2.1)                    | 4 (1.5)        |
| Drug abuse                                 | 20 (1.4)            | 15 (1.2)                    | 5 (1.9)        |
| Depression                                 | 223 (15.1)          | 189 (15.5)                  | 34 (13.0)      |
| <b>Home medications</b>                    |                     |                             |                |
| Angiotensin-converting enzyme inhibitor    | 266 (18.0)          | 200 (16.4)                  | 66 (25.2)      |
| Angiotensin receptor blocker               | 192 (13.0)          | 146 (12.0)                  | 46 (17.6)      |
| Other antihypertensive agent               | 609 (41.1)          | 464 (38.1)                  | 145 (55.3)     |
| Statin                                     | 528 (35.7)          | 393 (32.3)                  | 135 (51.5)     |
| Aspirin                                    | 353 (23.9)          | 245 (20.1)                  | 108 (41.2)     |
| Systemic corticosteroids                   | 92 (6.2)            | 67 (5.5)                    | 25 (9.5)       |
| Inhaled corticosteroids                    | 152 (10.3)          | 121 (9.9)                   | 31 (11.8)      |
| Immunosuppressive medication               | 92 (6.2)            | 70 (5.7)                    | 22 (8.4)       |
| [Hydroxy]chloroquine                       | 26 (1.8)            | 20 (1.6)                    | 6 (2.3)        |
| Long-term                                  | 6 (0.4)             | 4 (0.3)                     | 2 (0.8)        |
| Azithromycin                               | 109 (7.4)           | 95 (7.8)                    | 14 (5.3)       |
| Long-term                                  | 4 (0.3)             | 4 (0.3)                     | 0 (0.0)        |

<sup>a</sup> Where ≥1 patient had missing data, the number of patients with nonmissing data is shown.

<sup>b</sup> Calculated as weight in kilograms divided by height in meters squared.

**Supplemental Table 3**  
**Adults with positive SARS-CoV-2 tests admitted to study hospitals from March 1 to April 1, 2020**

| Characteristic                                  | Overall (N=4927) |
|-------------------------------------------------|------------------|
| Age, y, median (IQR) (n=4895)                   | 62 (50-73)       |
| Female, No. (%) (n=4921)                        | 2120 (43.1)      |
| Race/ethnicity, No. (%)                         |                  |
| Hispanic/Latino                                 | 1081 (21.9)      |
| Asian (non-Hispanic)                            | 168 (3.4)        |
| Black (non-Hispanic)                            | 1855 (37.6)      |
| White (non-Hispanic)                            | 1055 (21.4)      |
| Native Hawaiian/Pacific Islander (non-Hispanic) | 10 (0.2)         |
| American Indian/Native Alaskan (non-Hispanic)   | 8 (0.2)          |
| Multiple (non-Hispanic)                         | 11 (0.2)         |
| Other/unknown                                   | 739 (15.0)       |

**Supplemental Table 4**  
**Detailed clinical characteristics of patients at the time of hospital admission<sup>a</sup>**

| Characteristic                                | Overall (N=1480) | Hospital outcome          |                  |
|-----------------------------------------------|------------------|---------------------------|------------------|
|                                               |                  | Discharged alive (n=1218) | Died (n=262)     |
| <b>Symptom</b>                                |                  |                           |                  |
| Fever                                         | 1237 (83.6)      | 1036 (85.1)               | 201 (76.7)       |
| Chills                                        | 573 (38.7)       | 505 (41.5)                | 68 (26.0)        |
| Cough                                         | 1253 (84.7)      | 1058 (86.9)               | 195 (74.4)       |
| Productive cough                              | 360 (24.3)       | 305 (25.0)                | 55 (21.0)        |
| Sore throat                                   | 205 (13.9)       | 179 (14.7)                | 26 (9.9)         |
| Rhinorrhea                                    | 178 (12.0)       | 161 (13.2)                | 17 (6.5)         |
| Chest pain                                    | 249 (16.8)       | 227 (18.6)                | 22 (8.4)         |
| Dyspnea                                       | 1181 (79.8)      | 984 (80.8)                | 197 (75.2)       |
| Myalgia/arthralgia                            | 535 (36.1)       | 478 (39.2)                | 57 (21.8)        |
| Confusion                                     | 148 (10.0)       | 78 (6.4)                  | 70 (26.7)        |
| Anosmia or ageusia                            | 77 (5.2)         | 73 (6.0)                  | 4 (1.5)          |
| Nausea or vomiting                            | 362 (24.5)       | 318 (26.1)                | 44 (16.8)        |
| Abdominal pain                                | 148 (10.0)       | 126 (10.3)                | 22 (8.4)         |
| Diarrhea                                      | 399 (27.0)       | 349 (28.7)                | 50 (19.1)        |
| <b>Initial vital signs</b>                    |                  |                           |                  |
| Hypotension <sup>b</sup>                      | 56/1474 (3.8)    | 32/1212 (2.6)             | 24/262 (9.2)     |
| Heart rate >100 beats per minute              | 512/1474 (34.7)  | 428/1212 (35.3)           | 84/262 (32.1)    |
| Tachypnea <sup>c</sup>                        | 388/1478 (26.3)  | 297/1216 (24.4)           | 91/262 (34.7)    |
| Hypoxemia (Sp <sub>o</sub> <sub>2</sub> <90%) | 179/1474 (12.1)  | 127/1213 (10.5)           | 52/261 (19.9)    |
| Score on Glasgow Coma Scale (n=1462)          | 15 (15-15)       | 15 (15-15)                | 15 (14-15)       |
| Sp <sub>o</sub> <sub>2</sub> , % (n=1474)     | 95 (92-97)       | 95 (92-97)                | 94 (91-97)       |
| <b>Pao<sub>2</sub>/Fio<sub>2</sub> ratio</b>  |                  |                           |                  |
| ≥300                                          | 938/1452 (64.6)  | 832/1195 (69.6)           | 106/257 (41.2)   |
| 200-299                                       | 319/1452 (22.0)  | 248/1195 (20.8)           | 71/257 (27.6)    |
| 100-199                                       | 144/1452 (9.9)   | 92/1195 (7.7)             | 52/257 (20.2)    |
| <100                                          | 51/1452 (3.5)    | 23/1195 (1.9)             | 28/257 (10.9)    |
| SOFA score ≥2                                 | 1203 (81.3)      | 949 (77.9)                | 254 (96.9)       |
| <b>Initial laboratory results</b>             |                  |                           |                  |
| Hemoglobin, g/dL (n=1472)                     | 13.3 (12.0-14.6) | 13.4 (12.2-14.7)          | 12.4 (10.8-13.8) |
| Platelets, 1000/μL (n=1466)                   | 187 (146-237)    | 192 (150-238)             | 173 (132-234)    |
| Lymphocyte count <1000/μL                     | 680/1271 (53.5)  | 532/1036 (51.4)           | 148/235 (63.0)   |
| Urea nitrogen, mg/dL (n=1446)                 | 15 (11-24)       | 14 (10-21)                | 25 (16-39)       |
| Albumin, g/dL (n=1133)                        | 3.7 (3.3-4.0)    | 3.7 (3.4-4.0)             | 3.4 (3.0-3.8)    |
| Lactate dehydrogenase, U/L (n=590)            | 335 (251-443)    | 321 (248-421)             | 443 (313-567)    |
| C-reactive protein, mg/L (n=577)              | 21 (8-84)        | 19 (7-80)                 | 28 (13-123)      |
| Ferritin >1000 ng/mL                          | 163/568 (28.7)   | 124/483 (25.7)            | 39/85 (45.9)     |
| D-dimer >1.0 mg/L                             | 168/438 (38.4)   | 122/370 (33.0)            | 46/68 (67.6)     |

Abbreviations: Fio<sub>2</sub>, fraction of inspired oxygen; SOFA, Sequential Organ Failure Assessment; Sp<sub>o</sub><sub>2</sub>, oxygen saturation as measured by pulse oximetry.

<sup>a</sup> Values reported as number (percentage) or median (IQR). Where ≥1 patient had missing data, the number of patients with nonmissing data is shown.

<sup>b</sup> Defined as systolic blood pressure <90 mm Hg or mean arterial pressure <65 mm Hg.

<sup>c</sup> Defined as respiratory rate >22 breaths per minute.

**Supplemental Table 5**  
**Complications clinically diagnosed during hospitalization<sup>a</sup>**

| Complication                        | Overall (N=1480) | Hospital outcome          |                |
|-------------------------------------|------------------|---------------------------|----------------|
|                                     |                  | Discharged alive (n=1218) | Died (n=262)   |
| Stroke                              | 14 (0.9)         | 7 (0.6)                   | 7 (2.7)        |
| Atrial fibrillation                 | 145 (9.8)        | 80 (6.6)                  | 65 (24.8)      |
| Ventricular arrhythmias             | 43 (2.9)         | 17 (1.4)                  | 26 (9.9)       |
| Cardiac arrest                      | 81 (5.5)         | 4 (0.3)                   | 77 (29.4)      |
| Myocardial infarction               | 47 (3.2)         | 28 (2.3)                  | 19 (7.3)       |
| Congestive heart failure            | 67 (4.5)         | 39 (3.2)                  | 28 (10.7)      |
| Acute respiratory distress syndrome | 483 (32.6)       | 283 (23.2)                | 200 (76.3)     |
| Arterial ischemic event             | 5 (0.3)          | 4 (0.3)                   | 1 (0.4)        |
| Venous thromboembolism              | 46 (3.1)         | 33 (2.7)                  | 13 (5.0)       |
| Deep vein thrombosis                | 28 (1.9)         | 21 (1.7)                  | 7 (2.7)        |
| Pulmonary embolism                  | 21 (1.4)         | 14 (1.1)                  | 7 (2.7)        |
| Shock                               | 302 (20.4)       | 141 (11.6)                | 161 (61.5)     |
| Bacteremia                          | 82 (5.5)         | 50 (4.1)                  | 32 (12.2)      |
| Acute renal failure <sup>b</sup>    | 321/1437 (22.3)  | 173/1188 (14.6)           | 148/249 (59.4) |

<sup>a</sup> Values reported as number (percentage). Complications were obtained from clinical documentation.

<sup>b</sup> Restricted to patients not requiring hemodialysis at baseline.

**Supplemental Table 6**  
**Clinical management within 24 hours of hospital admission<sup>a</sup>**

| Characteristic                            | Overall (N=1480) | Hospital outcome          |              |
|-------------------------------------------|------------------|---------------------------|--------------|
|                                           |                  | Discharged alive (n=1218) | Died (n=262) |
| Highest level of care                     |                  |                           |              |
| General care area                         | 1032 (69.7)      | 930 (76.4)                | 102 (38.9)   |
| Intermediate care                         | 79 (5.3)         | 59 (4.8)                  | 20 (7.6)     |
| Intensive care                            | 369 (24.9)       | 229 (18.8)                | 140 (53.4)   |
| Respiratory support techniques            |                  |                           |              |
| Nasal cannula or face mask                | 773 (52.2)       | 648 (53.2)                | 125 (47.7)   |
| High-flow nasal cannula                   | 29 (2.0)         | 20 (1.6)                  | 9 (3.4)      |
| Noninvasive positive pressure ventilation | 25 (1.7)         | 15 (1.2)                  | 10 (3.8)     |
| Mechanical ventilation                    | 203 (13.7)       | 110 (9.0)                 | 93 (35.5)    |
| Prone positioning                         | 30 (2.0)         | 20 (1.6)                  | 10 (3.8)     |
| Inhaled pulmonary vasodilator             | 19 (1.3)         | 10 (0.8)                  | 9 (3.4)      |
| Extracorporeal membrane oxygenation       | 5 (0.3)          | 4 (0.3)                   | 1 (0.4)      |
| Vasopressors or inotropes                 | 131 (8.9)        | 62 (5.1)                  | 69 (26.3)    |
| Renal replacement therapy                 | 33 (2.2)         | 20 (1.6)                  | 13 (5.0)     |
| Pharmacologic therapy administered        |                  |                           |              |
| Azithromycin                              | 791 (53.4)       | 646 (53.0)                | 145 (55.3)   |
| Other antibiotics                         | 978 (66.1)       | 774 (63.5)                | 204 (77.9)   |
| Therapeutic anticoagulation               | 166 (11.2)       | 113 (9.3)                 | 53 (20.2)    |
| Hydroxychloroquine or chloroquine         | 309 (20.9)       | 247 (20.3)                | 62 (23.7)    |
| Interleukin 6 receptor antagonist         | 18 (1.2)         | 12 (1.0)                  | 6 (2.3)      |
| Oral or intravenous corticosteroids       | 135 (9.1)        | 102 (8.4)                 | 33 (12.6)    |
| Remdesivir                                | 20 (1.4)         | 18 (1.5)                  | 2 (0.8)      |
| Lopinavir/ritonavir                       | 12 (0.8)         | 8 (0.7)                   | 4 (1.5)      |

<sup>a</sup> Values reported as number (percentage).

**Supplemental Table 7**  
**Risk factors for early respiratory failure<sup>a,b</sup>**

| Risk factor                               | Cross-validation models including variable, % | Candidate risk factor included in final model? | Odds ratio (95% CI) |
|-------------------------------------------|-----------------------------------------------|------------------------------------------------|---------------------|
| Female sex                                | 50.4                                          | Yes                                            | 0.71 (0.51-0.98)    |
| Body mass index                           | 55.1                                          | Yes                                            | 1.03 (1.01-1.05)    |
| Chronic cardiovascular disease            | 60.2                                          | Yes                                            | 1.21 (0.86-1.69)    |
| Cough                                     | 59.2                                          | Yes                                            | 0.62 (0.41-0.95)    |
| Dyspnea                                   | 73.2                                          | Yes                                            | 2.19 (1.36-3.53)    |
| URI symptoms                              | 46.5                                          | Yes                                            | 0.79 (0.54-1.16)    |
| Gastrointestinal symptoms                 | 85.0                                          | Yes                                            | 0.75 (0.54-1.04)    |
| Respiratory rate <sup>c</sup>             | 100                                           | Yes                                            | 1.09 (1.06-1.12)    |
| Glasgow Coma Scale <15 <sup>c</sup>       | 100                                           | Yes                                            | 4.69 (3.07-7.16)    |
| Serum creatinine (mg/dL) <sup>c</sup>     | 61.6                                          | Yes                                            | 1.10 (1.02-1.18)    |
| White blood count (×1000/μL) <sup>c</sup> | 99.6                                          | Yes                                            | 1.07 (1.04-1.11)    |
| Serum AST >40 U/L <sup>c</sup>            | 89.7                                          | Yes                                            | 1.77 (1.27-2.49)    |
| Days from symptom onset                   | 27.1                                          | No                                             | —                   |
| Age                                       | 28.8                                          | No                                             | —                   |
| Race/ethnicity                            | 15.3                                          | No                                             | —                   |
| Chronic respiratory disease               | 35.0                                          | No                                             | —                   |
| Diabetes                                  | 39.6                                          | No                                             | —                   |
| Smoking and/or vaping                     | 20.7                                          | No                                             | —                   |
| Chronic use of systemic steroids          | 19.7                                          | No                                             | —                   |
| Long-term care facility resident          | 28.1                                          | No                                             | —                   |
| Heart rate <sup>c</sup>                   | 34.5                                          | No                                             | —                   |
| Systolic blood pressure <sup>c</sup>      | 39.8                                          | No                                             | —                   |
| Temperature <sup>c</sup>                  | 14.6                                          | No                                             | —                   |

Abbreviations: AST, aspartate aminotransferase; URI, upper respiratory tract infection.

<sup>a</sup> Early respiratory failure defined as defined as treatment with ≥11 L/min oxygen by face mask, high flow oxygen device, noninvasive positive pressure ventilation, or invasive mechanical ventilation within 24 hours of hospital arrival. Death without respiratory failure within 24 hours was treated as a respiratory failure event to account for effects of patients' care goals on respiratory support interventions.

<sup>b</sup> Analysis includes 1437 patients admitted directly to the study hospital or transferred to the study hospital from an outside emergency department.

<sup>c</sup> First-available value after study hospital arrival.

**Supplemental Table 8**  
**Risk factors for late respiratory failure<sup>a,b</sup>**

| Risk factor                                                                    | Cross-validation models including variable, % | Candidate risk factor included in final model? | Odds ratio (95% CI) |
|--------------------------------------------------------------------------------|-----------------------------------------------|------------------------------------------------|---------------------|
| Days from symptom onset                                                        | 99.8                                          | Yes                                            | 0.94 (0.90-0.98)    |
| Female sex                                                                     | 96.7                                          | Yes                                            | 0.55 (0.41-0.74)    |
| Age, y                                                                         | 89.1                                          | Yes                                            | Reference           |
| <40                                                                            |                                               |                                                | 1.49 (0.76-2.90)    |
| 40-49                                                                          |                                               |                                                | 1.91 (1.04-3.53)    |
| 50-59                                                                          |                                               |                                                | 2.49 (1.36-4.59)    |
| 60-69                                                                          |                                               |                                                | 4.11 (2.19-7.72)    |
| 70-79                                                                          |                                               |                                                | 4.89 (2.52-9.47)    |
| ≥80                                                                            |                                               |                                                |                     |
| Diabetes                                                                       | 94.7                                          | Yes                                            | 1.39 (1.01-1.90)    |
| Long-term care facility resident                                               | 82.2                                          | Yes                                            | 0.81 (0.46-1.44)    |
| Highest heart rate (per 10 beat per minute increase) <sup>c</sup>              | 77.1                                          | Yes                                            | 1.07 (1.06-1.08)    |
| Highest respiratory rate, <sup>c</sup>                                         | 100                                           | Yes                                            | 1.06 (1.04-1.09)    |
| Body temperature <sup>d</sup>                                                  | 80.5                                          | Yes                                            | Reference           |
| Hypothermic (<36 °C)                                                           |                                               |                                                | 0.35 (0.13-0.91)    |
| Normothermic (36-38 °C)                                                        |                                               |                                                | 1.50 (1.10-2.05)    |
| Hyperthermic (>38 °C)                                                          |                                               |                                                |                     |
| First-available score on Glasgow Coma Scale <15 <sup>c</sup>                   | 99.9                                          | Yes                                            | 2.05 (1.19-3.53)    |
| First-available serum creatinine level (mg/dL) <sup>c</sup>                    | 91.0                                          | Yes                                            | 1.06 (0.98-1.16)    |
| First-available white blood cell count (×1000/μL) <sup>c</sup>                 | 87.9                                          | Yes                                            | 1.05 (1.02-1.09)    |
| Race/ethnicity                                                                 | 40.8                                          | No                                             | —                   |
| Body mass index                                                                | 27.2                                          | No                                             | —                   |
| Chronic respiratory disease                                                    | 31.4                                          | No                                             | —                   |
| Chronic cardiovascular disease                                                 | 33.5                                          | No                                             | —                   |
| Smoking and/or vaping                                                          | 39.6                                          | No                                             | —                   |
| Chronic use of systemic steroids                                               | 21.1                                          | No                                             | —                   |
| Lowest systolic blood pressure <sup>c</sup>                                    | 49.3                                          | No                                             | —                   |
| First-available serum level of aspartate aminotransferase >40 U/L <sup>c</sup> | 23.1                                          | No                                             | —                   |

<sup>a</sup> Late respiratory failure defined as defined as treatment with ≥11 L/min oxygen by face mask, high flow oxygen device, noninvasive positive pressure ventilation, or invasive mechanical ventilation beginning >24 hours of hospital arrival. Death without respiratory failure after 24 hours was treated as a respiratory failure event to account for effects of patients' care goals on respiratory support interventions.

<sup>b</sup> Analysis includes 1196 patients who did not die or develop respiratory failure within 24 hours of study hospital arrival.

<sup>c</sup> Value obtained within 24 hours of hospital arrival.

<sup>d</sup> Temperature most different from 37 °C in the first 24 hours after arrival at the study hospital.

## Supplemental Table 9

### Surviving patients' demographic, clinical, and management characteristics by discharge on new or increased respiratory support<sup>a</sup>

| Characteristic                                    | All survivors<br>(N= 1218) | Respiratory support at discharge                   |                                                               |
|---------------------------------------------------|----------------------------|----------------------------------------------------|---------------------------------------------------------------|
|                                                   |                            | New or increased<br>respiratory support<br>(n=221) | No escalation from baseline<br>respiratory support<br>(n=997) |
| Age                                               | 59.3 (46.9-70.2)           | 65.2 (52.0-73.4)                                   | 58.4 (46.1-69.0)                                              |
| Female sex                                        | 560 (46.0)                 | 105 (47.5)                                         | 455 (45.6)                                                    |
| Race/ethnicity                                    |                            |                                                    |                                                               |
| Hispanic or Latino                                | 247 (20.3)                 | 46 (20.8)                                          | 201 (20.2)                                                    |
| Non-Hispanic Black                                | 367 (30.1)                 | 53 (24.0)                                          | 314 (31.5)                                                    |
| Non-Hispanic White                                | 433 (35.6)                 | 98 (44.3)                                          | 335 (33.6)                                                    |
| Other/unknown                                     | 171 (14.0)                 | 24 (10.9)                                          | 147 (14.7)                                                    |
| Body mass index <sup>b</sup> (n=1140)             | 30.4 (26.2-35.9)           | 30.5 (26.0-35.3)                                   | 30.4 (26.3-36.1)                                              |
| Charlson Comorbidity Index                        | 2 (1-4)                    | 3 (1-5)                                            | 2 (1-4)                                                       |
| Comorbidities                                     |                            |                                                    |                                                               |
| Chronic pulmonary disease                         | 279 (22.9)                 | 58 (26.2)                                          | 221 (22.2)                                                    |
| Cardiovascular disease                            | 162 (13.3)                 | 33 (14.9)                                          | 129 (12.9)                                                    |
| Chronic renal failure                             | 111 (9.1)                  | 24 (10.9)                                          | 87 (8.7)                                                      |
| Hypertension                                      | 653 (53.6)                 | 132 (59.7)                                         | 521 (52.3)                                                    |
| Diabetes                                          | 337 (27.7)                 | 63 (28.5)                                          | 274 (27.5)                                                    |
| Admitted from care facility                       | 70/1214 (5.8)              | 11 (5.0)                                           | 59 (5.9)                                                      |
| Hospital day 1 SOFA score                         | 2 (2-4)                    | 3 (2-4)                                            | 2 (1-3)                                                       |
| Initial vital signs                               |                            |                                                    |                                                               |
| Respiratory rate, breaths per minute (n= 1216)    | 20 (18-22)                 | 20 (18-23)                                         | 20 (18-22)                                                    |
| Glasgow Coma Scale score <15                      | 103/1204 (8.6)             | 17 (7.7)                                           | 86 (8.6)                                                      |
| Pao <sub>2</sub> /Fio <sub>2</sub> ratio (n=1195) | 337 (279-431)              | 291 (232-337)                                      | 360 (291-431)                                                 |
| Respiratory failure                               | 345 (28.3)                 | 106 (48.0)                                         | 239 (24.0)                                                    |
| Admitted to intensive care unit                   | 371 (30.5)                 | 107 (48.4)                                         | 264 (26.5)                                                    |
| Therapies during hospitalization                  |                            |                                                    |                                                               |
| Inpatient respiratory support (ever)              |                            |                                                    |                                                               |
| Nasal cannula or face mask                        | 934 (76.7)                 | 219 (99.1)                                         | 715 (71.7)                                                    |
| High-flow nasal cannula                           | 178 (14.6)                 | 65 (29.4)                                          | 113 (11.3)                                                    |
| Noninvasive positive pressure ventilation         | 90 (7.4)                   | 30 (13.6)                                          | 60 (6.0)                                                      |
| Mechanical ventilation                            | 226 (18.6)                 | 62 (28.1)                                          | 164 (16.4)                                                    |
| Vasopressors or inotropes                         | 184 (15.1)                 | 48 (21.7)                                          | 136 (13.6)                                                    |
| Renal replacement therapy                         | 62 (5.1)                   | 15 (6.8)                                           | 47 (4.7)                                                      |
| Pharmacologic therapy                             |                            |                                                    |                                                               |
| Therapeutic anticoagulation                       | 240 (19.7)                 | 51 (23.1)                                          | 189 (19.0)                                                    |
| Hydroxychloroquine or chloroquine                 | 629 (51.6)                 | 133 (60.2)                                         | 496 (49.7)                                                    |
| Interleukin 6 receptor antagonist                 | 71 (5.8)                   | 16 (7.2)                                           | 55 (5.5)                                                      |
| Systemic corticosteroids                          | 134 (11.0)                 | 30 (13.6)                                          | 104 (10.4)                                                    |
| Remdesivir                                        | 72 (5.9)                   | 11 (5.0)                                           | 61 (6.1)                                                      |
| Hospital length of stay, d                        | 8 (5-15)                   | 11 (6-19)                                          | 7 (4-13)                                                      |

Abbreviations: Fio<sub>2</sub>, fraction of inspired oxygen; SOFA, Sequential Organ Failure Assessment; Spo<sub>2</sub>, oxygen saturation as measured by pulse oximetry.

<sup>a</sup> Values reported as number (percentage) or median (IQR). Where ≥1 patient had missing data, the number of patients with nonmissing data is shown.

<sup>b</sup> Calculated as weight in kilograms divided by height in meters squared.



**Supplemental Table 10**  
**Demographic, clinical, and management characteristics among patients**  
**admitted from home stratified by discharge with new health care services<sup>a</sup>**

| Characteristic                                    | All survivors admitted from home <sup>b</sup><br>(N=1153) | Health care services at discharge                           |                                        |
|---------------------------------------------------|-----------------------------------------------------------|-------------------------------------------------------------|----------------------------------------|
|                                                   |                                                           | New home- or facility-based health care services<br>(n=259) | No new health care services<br>(n=894) |
| Age                                               | 58.6 (46.4-69.3)                                          | 69.5 (59.0-78.6)                                            | 55.5 (43.8-66.0)                       |
| Female sex                                        | 531 (46.1)                                                | 119 (45.9)                                                  | 412 (46.1)                             |
| Race/ethnicity                                    |                                                           |                                                             |                                        |
| Hispanic or Latino                                | 239 (20.7)                                                | 43 (16.6)                                                   | 196 (21.9)                             |
| Non-Hispanic Black                                | 352 (30.5)                                                | 75 (29.0)                                                   | 277 (31.0)                             |
| Non-Hispanic White                                | 403 (35.0)                                                | 116 (44.8)                                                  | 287 (32.1)                             |
| Other/unknown                                     | 159 (13.8)                                                | 25 (9.7)                                                    | 134 (15.0)                             |
| Body mass index (n=1089)                          | 30.5 (26.2-36.1)                                          | 28.7 (25.2-33.7)                                            | 30.8 (26.7-36.4)                       |
| Charlson Comorbidity Index                        | 2 (1-4)                                                   | 4 (2-5)                                                     | 2 (0-3)                                |
| Comorbidities                                     |                                                           |                                                             |                                        |
| Chronic pulmonary disease                         | 262 (22.7)                                                | 63 (24.3)                                                   | 199 (22.3)                             |
| Cardiovascular disease                            | 143 (12.4)                                                | 61 (23.6)                                                   | 82 (9.2)                               |
| Chronic renal failure                             | 103 (8.9)                                                 | 38 (14.7)                                                   | 65 (7.3)                               |
| Hypertension                                      | 612 (53.1)                                                | 164 (63.3)                                                  | 448 (50.1)                             |
| Diabetes                                          | 318 (27.6)                                                | 85 (32.8)                                                   | 233 (26.1)                             |
| Hospital day 1 SOFA score                         | 2 (2-3)                                                   | 4 (2-6)                                                     | 2 (1-3)                                |
| Initial vital signs                               |                                                           |                                                             |                                        |
| Respiratory rate, breaths per minute, (n=1151)    | 20 (18-22)                                                | 20 (18-24)                                                  | 20 (18-22)                             |
| Glasgow Coma Scale score <15                      | 74/1139 (6.5)                                             | 45/254 (17.7)                                               | 29/885 (3.3)                           |
| Pao <sub>2</sub> /Fio <sub>2</sub> ratio (n=1133) | 337 (279-431)                                             | 319 (221-390)                                               | 360 (291-431)                          |
| Respiratory failure                               | 330 (28.6)                                                | 166 (64.1)                                                  | 164 (18.3)                             |
| Admitted to intensive care unit                   | 355 (30.8)                                                | 160 (61.8)                                                  | 195 (21.8)                             |
| Therapies during hospitalization                  |                                                           |                                                             |                                        |
| Inpatient respiratory support (ever)              |                                                           |                                                             |                                        |
| Nasal cannula or face mask                        | 880 (76.3)                                                | 231 (89.2)                                                  | 649 (72.6)                             |
| High-flow nasal cannula                           | 172 (14.9)                                                | 78 (30.1)                                                   | 94 (10.5)                              |
| Noninvasive positive pressure ventilation         | 84 (7.3)                                                  | 41 (15.8)                                                   | 43 (4.8)                               |
| Mechanical ventilation                            | 212 (18.4)                                                | 134 (51.7)                                                  | 78 (8.7)                               |
| Vasopressors or inotropes                         | 179 (15.5)                                                | 120 (46.3)                                                  | 59 (6.6)                               |
| Renal replacement therapy                         | 58 (5.0)                                                  | 36 (13.9)                                                   | 22 (2.5)                               |
| Pharmacologic therapy                             |                                                           |                                                             |                                        |
| Therapeutic anticoagulation                       | 222 (19.3)                                                | 108 (41.7)                                                  | 114 (12.8)                             |
| Hydroxychloroquine or chloroquine                 | 604 (52.4)                                                | 172 (66.4)                                                  | 432 (48.3)                             |
| Interleukin 6 receptor antagonist                 | 69 (6.0)                                                  | 33 (12.7)                                                   | 36 (4.0)                               |
| Systemic corticosteroids                          | 129 (11.2)                                                | 55 (21.2)                                                   | 74 (8.3)                               |
| Remdesivir                                        | 71 (6.2)                                                  | 25 (9.7)                                                    | 46 (5.1)                               |
| Hospital length of stay, d                        | 8 (4-14)                                                  | 22 (12-32)                                                  | 6 (4-10)                               |

Abbreviations: Fio<sub>2</sub>, fraction of inspired oxygen; SOFA, Sequential Organ Failure Assessment; Spo<sub>2</sub>, oxygen saturation as measured by pulse oximetry.

<sup>a</sup> Values reported as number (percentage) or median (IQR). Where ≥1 patient had missing data, the number of patients with nonmissing data is shown.

<sup>b</sup> Includes patients surviving to discharge who did not reside in a long-term care or rehabilitation facility or a long-term acute care hospital at baseline.

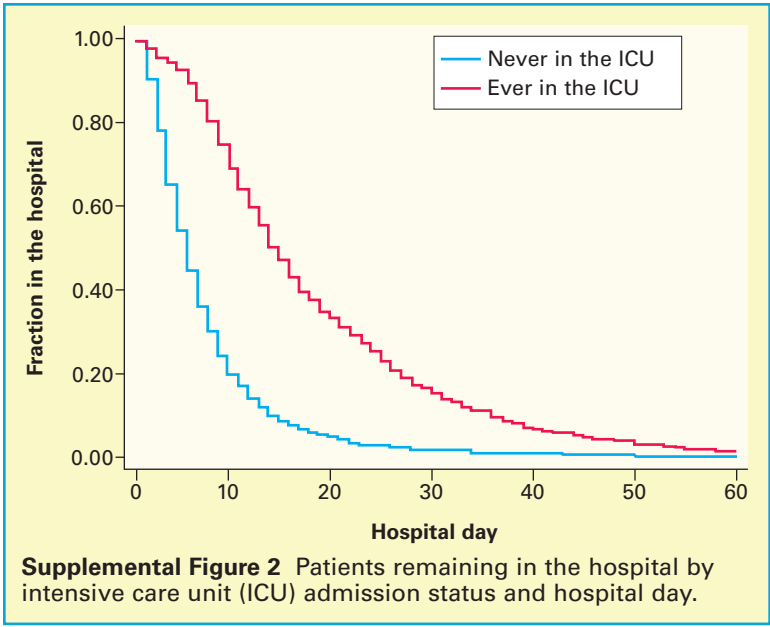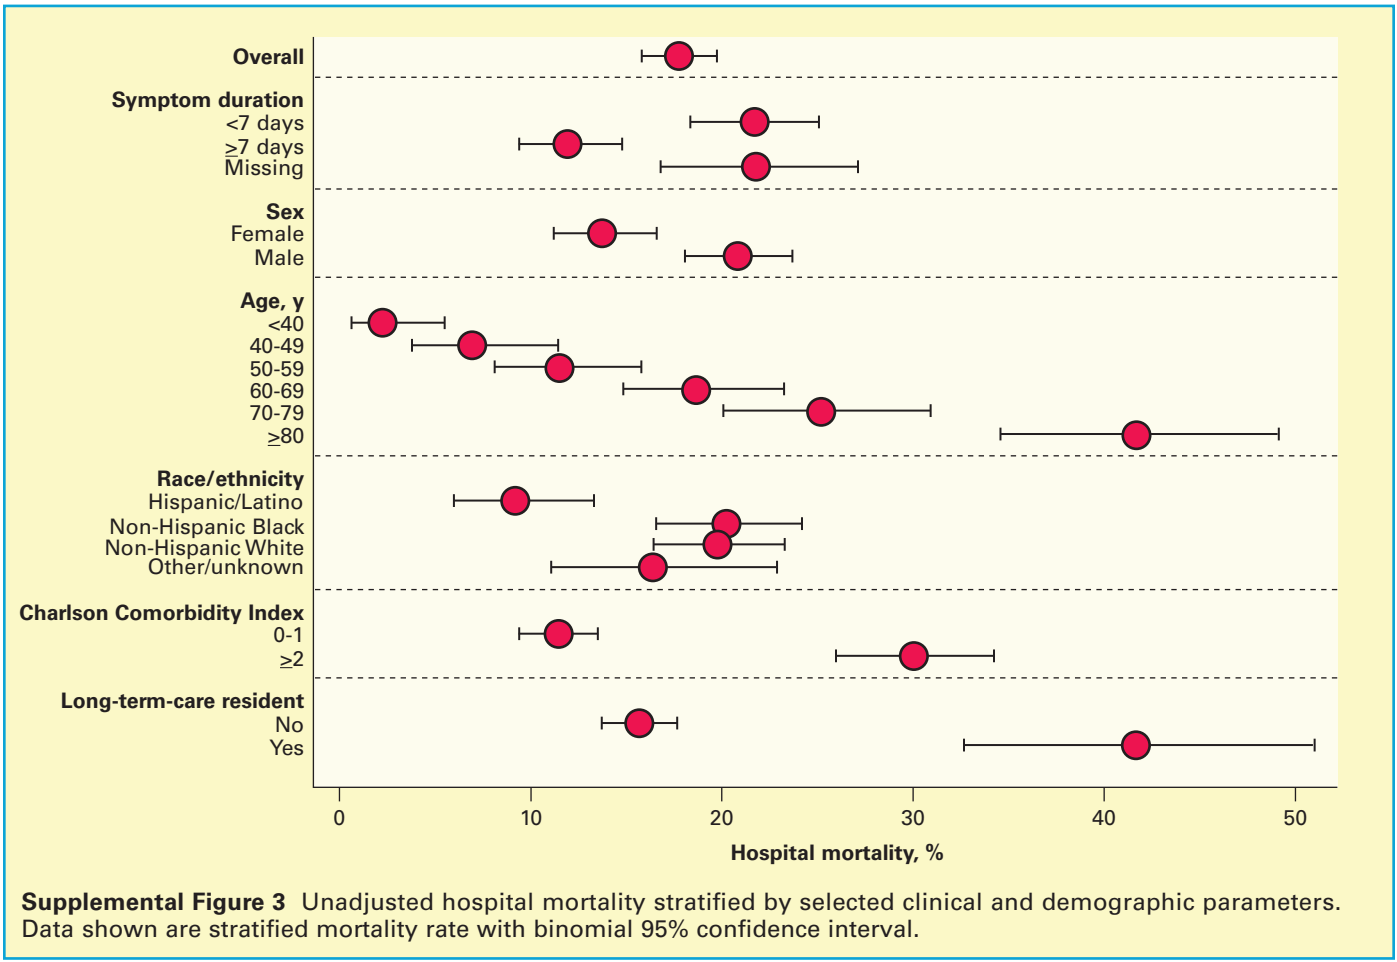

Supplement: NIHMS1754245-supplement-Online_supplement.pdf [file NIHMS1754245-supplement-Online_supplement.pdf]
